# Supplementary material for: Stretchable and conductive polymer films for high-performance electromagnetic interference shielding
Source: Royal Society of Chemistry journal article supplement (doi:10.1039/c6tc01619g), 2016-01-01
Supplement: c6tc01619g1.pdf [file c6tc01619g1.pdf]

## Supporting Information

### **Stretchable and Conductive Polymer Films for High-Performance Electromagnetic Interference Shielding**

*Pengcheng Li,<sup>†a</sup> Donghe Du,<sup>†a</sup> Lin Guo,<sup>b</sup> Yongxin Guo<sup>b</sup> and Jianyong Ouyang<sup>\*a</sup>*

<sup>a</sup>. Department of Materials Science & Engineering, National University of Singapore, 7 Engineering Drive 1, Singapore, 117574. E-mail: mseoj@nus.edu.sg

<sup>b</sup>. Department of Electrical and Computer Engineering, National University of Singapore, 4 Engineering Drive 3, Singapore, 117576.

Corresponding Author

\*E-mail: [mseoj@nus.edu.sg](mailto:mseoj@nus.edu.sg) (Jianyong Ouyang)

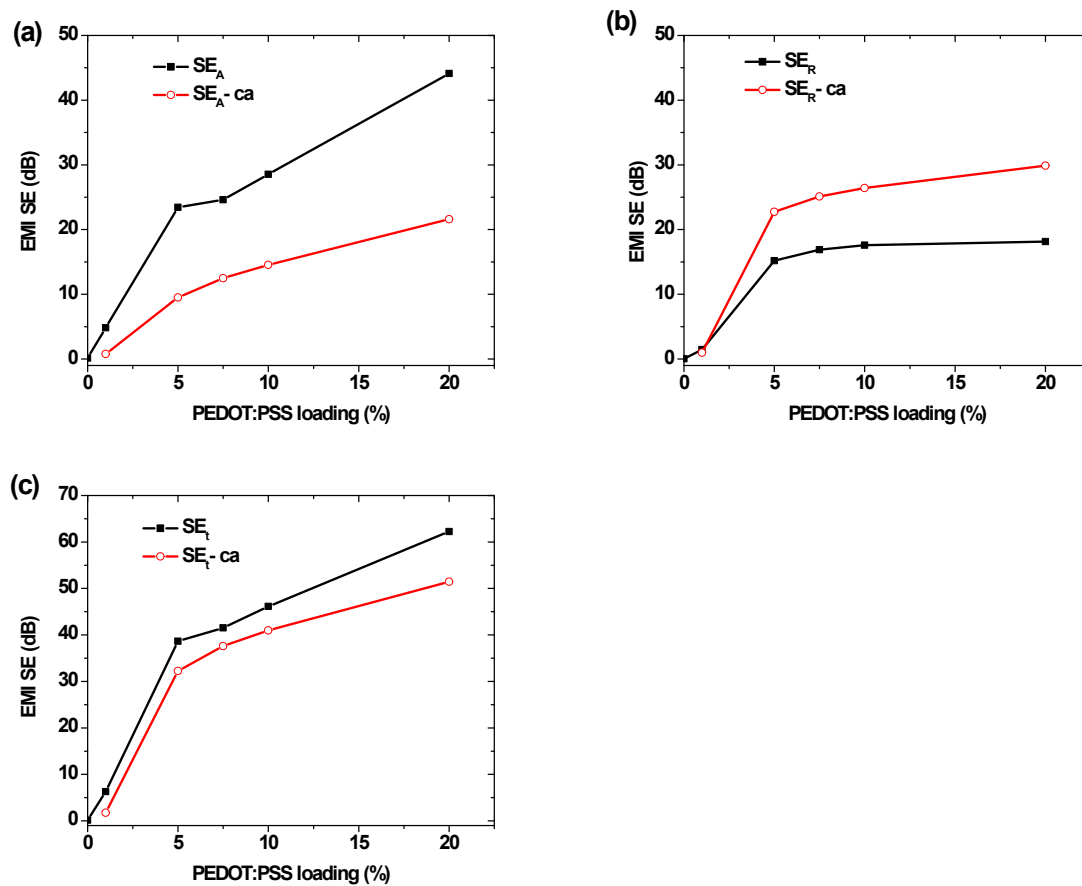

Figure S1. Comparison between EMI SE data experimentally obtained and theoretically calculated (ca). (a)  $SE_A$  and  $SE_A - ca$ , (b)  $SE_R$  and  $SE_R - ca$ , (c)  $SE_t$  and  $SE_t - ca$ .

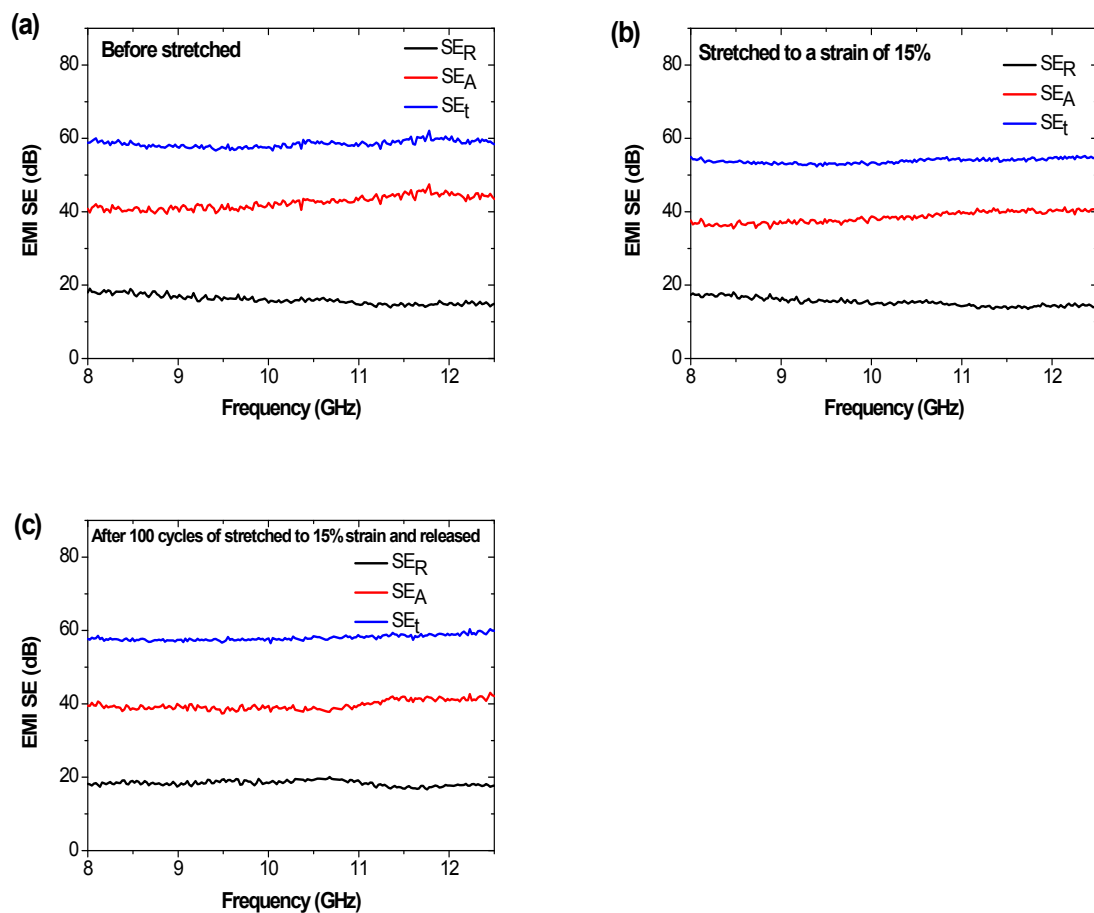

Figure S2.  $SE_t$ ,  $SE_A$  and  $SE_R$  of a 20wt% PEDOT:PSS/WPU film before stretched, stretched to a strain of 15% and after cyclic stretched to 15% strain and released for 100 times.
